# Supplementary material for: Spatiotemporal control of RNA metabolism and CRISPR–Cas functions using engineered photoswitchable RNA-binding proteins
Source: Springer Nature journal article supplement (doi:10.1038/s41596-023-00920-w), 2023-11-30

## Reporting Summary

Nature Research wishes to improve the reproducibility of the work that we publish. This form provides structure for consistency and transparency in reporting. For further information on Nature Research policies, see [Authors & Referees](#) and the [Editorial Policy Checklist](#).

Please do not complete any field with "not applicable" or n/a. Refer to the help text for what text to use if an item is not relevant to your study.

For final submission: please carefully check your responses for accuracy; you will not be able to make changes later.

### Statistics

For all statistical analyses, confirm that the following items are present in the figure legend, table legend, main text, or Methods section.

- |     |                                 |
|-----|---------------------------------|
| n/a | <input type="radio"/> Confirmed |
|-----|---------------------------------|
- The exact sample size ( $n$ ) for each experimental group/condition, given as a discrete number and unit of measurement
  - A statement on whether measurements were taken from distinct samples or whether the same sample was measured repeatedly
  - The statistical test(s) used AND whether they are one- or two-sided  
*Only common tests should be described solely by name; describe more complex techniques in the Methods section.*
  - A description of all covariates tested
  - A description of any assumptions or corrections, such as tests of normality and adjustment for multiple comparisons
  - 
  - A full description of the statistical parameters including central tendency (e.g. means) or other basic estimates (e.g. regression coefficient) AND variation (e.g. standard deviation) or associated estimates of uncertainty (e.g. confidence intervals)
    - For null hypothesis testing, the test statistic (e.g.  $F$ ,  $t$ ,  $r$ ) with confidence intervals, effect sizes, degrees of freedom and  $P$  value noted  
*Give  $P$  values as exact values whenever suitable.*
    - For Bayesian analysis, information on the choice of priors and Markov chain Monte Carlo settings
    - For hierarchical and complex designs, identification of the appropriate level for tests and full reporting of outcomes
    - Estimates of effect sizes (e.g. Cohen's  $d$ , Pearson's  $r$ ), indicating how they were calculated

*Our web collection on [statistics for biologists](#) contains articles on many of the points above.*

### Software and code

Policy information about [availability of computer code](#)

Data collection

Data analysis

For manuscripts utilizing custom algorithms or software that are central to the research but not yet described in published literature, software must be made available to editors/reviewers. We strongly encourage code deposition in a community repository (e.g. GitHub). See the Nature Research [guidelines for submitting code & software](#) for further information.

### Data

Policy information about [availability of data](#)

All manuscripts must include a [data availability statement](#). This statement should provide the following information, where applicable:

- Accession codes, unique identifiers, or web links for publicly available datasets
- A list of figures that have associated raw data
- A description of any restrictions on data availability

The main data discussed in this protocol are available in the supporting primary research paper (<https://doi.org/10.1038/s41587-021-01112-1>). The raw datasets are too large to be publicly shared but are available for research purposes from the corresponding authors upon reasonable request.

## Field-specific reporting

Please select the one below that is the best fit for your research. If you are not sure, read the appropriate sections before making your selection.

## Life sciences study design

---

All studies must disclose on these points even when the disclosure is negative.

- Sample size
- Data exclusions
- Replication
- Randomization
- Blinding

## Behavioural & social sciences study design

---

All studies must disclose on these points even when the disclosure is negative.

- Study description
- Research sample
- Sampling strategy
- Data collection
- Timing
- Data exclusions
- Non-participation
- Randomization

## Ecological, evolutionary & environmental sciences study design

---

All studies must disclose on these points even when the disclosure is negative.

- Study description
- Research sample
- Sampling strategy
- Data collection
- Timing and spatial scale
- Data exclusions
- Reproducibility
- Randomization
- Blinding

Did the study involve field work?  Yes  No

### Field work, collection and transport

---

- Field conditions
- Location
- Access and import/export
- Disturbance

## Reporting for specific materials, systems and methods

---

We require information from authors about some types of materials, experimental systems and methods used in many studies. Here, indicate whether each material, system or method listed is relevant to your study. If you are not sure if a list item applies to your research, read the appropriate section before selecting a response.

## Materials & experimental systems

- n/a Involved in the study
- Antibodies
  - Eukaryotic cell lines
  - Palaeontology
  - Animals and other organisms
  - Human research participants
  - Clinical data

## Methods

- n/a Involved in the study
- ChIP-seq
  - Flow cytometry
  - MRI-based neuroimaging

## Antibodies

Antibodies used

Validation

## Eukaryotic cell lines

Policy information about [cell lines](#)

Cell line source(s)

HEK293T(GNHu44) and HEK293(GNHu43) were purchased from Cell Bank of Chinese Academy

Authentication

No cell lines were authenticated

Mycoplasma contamination

All cell lines have been tested negative for mycoplasma contamination by PCR methods

Commonly misidentified lines  
(See [ICLAC](#) register)

No commonly misidentified cell lines were used

## Palaeontology

Specimen provenance

Specimen deposition

Dating methods

Tick this box to confirm that the raw and calibrated dates are available in the paper or in Supplementary Information.

## Animals and other organisms

Policy information about [studies involving animals](#); [ARRIVE guidelines](#) recommended for reporting animal research

Laboratory animals

Five-week-old male ICR mice; wild-type line (AB) zebrafish.

Wild animals

None

Field-collected samples

None

Ethics oversight

All procedures involving animals were approved by the Institutional Animal Care and Use Committee of Shanghai and were

Note that full information on the approval of the study protocol must also be provided in the manuscript.

## Human research participants

Policy information about [studies involving human research participants](#)

Population characteristics

Recruitment

Ethics oversight

Note that full information on the approval of the study protocol must also be provided in the manuscript.

## Clinical data

Policy information about [clinical studies](#)

All manuscripts should comply with the [ICMJE guidelines for publication of clinical research](#) and a completed [CONSORT checklist](#) must be included with all submissions.

Clinical trial registration

Study protocol

Data collection

Outcomes

## ChIP-seq

---

### Data deposition

Confirm that both raw and final processed data have been deposited in a public database such as [GEO](#).

Confirm that you have deposited or provided access to graph files (e.g. BED files) for the called peaks.

Data access links

*May remain private before publication*

Files in database submission

Genome browser session  
(e.g. [UCSC](#) )

### Methodology

Replicates

Sequencing depth

Antibodies

Peak calling parameters

Data quality

Software

## Flow Cytometry

---

### Plots

Confirm that:

The axis labels state the marker and fluorochrome used (e.g. CD4-FITC).

The axis scales are clearly visible. Include numbers along axes only for bottom left plot of group (a 'group' is an analysis of identical markers).

All plots are contour plots with outliers or pseudocolor plots.

A numerical value for number of cells or percentage (with statistics) is provided.

### Methodology

Sample preparation

The transfected cells were digested and resuspended in phenol red-free medium containing 10% fetal bovine serum. An equal

Instrument

A BD FACSJazz™ flow cytometer with a 488-nm laser for HBC530 fluorescence analysis.

Software

Cytextpert program (Beckman Coulter) was used to process flow cytometry data.

Cell population abundance

All reported populations were greater than 10,000 cells.

Gating strategy

Gates are placed based on the blank cells labeled with the same HBC labeling solution to determine the population fraction that

Tick this box to confirm that a figure exemplifying the gating strategy is provided in the Supplementary Information.

## Magnetic resonance imaging

---

### Experimental design

Design type

Design specifications

Behavioral performance measures

### Acquisition

Image type(s)

Field strength

Sequence & imaging parameters

Area of acquisition

Diffusion MRI

Used

Not used

### Preprocessing

Preprocessing software

Normalization

Normalization template

Noise and artifact removal

Volume censoring

### Statistical modeling & inference

Model type and settings

Effect(s) tested

Specify type of analysis:  Whole brain  ROI-based  Both

Statistic type for inference  
(See [Eklund et al. 2016](#) )

Correction

### Models & analysis

|                                     |                                               |                      |
|-------------------------------------|-----------------------------------------------|----------------------|
| n/a                                 | Included in the study                         |                      |
| <input checked="" type="checkbox"/> | Functional and/or effective connectivity      | <input type="text"/> |
| <input checked="" type="checkbox"/> | Graph analysis                                | <input type="text"/> |
| <input checked="" type="checkbox"/> | Multivariate modeling or predictive analysis  | <input type="text"/> |
|                                     | Functional and/or effective connectivity      | <input type="text"/> |
|                                     | Graph analysis                                | <input type="text"/> |
|                                     | Multivariate modeling and predictive analysis | <input type="text"/> |

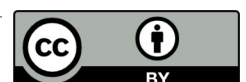

Supplement: MOESM2 [file 41596_2023_920_MOESM2_ESM11.pdf]
