# Supplementary material for: Spatiotemporal control of RNA metabolism and CRISPR–Cas functions using engineered photoswitchable RNA-binding proteins
Source: Springer Nature journal article supplement (doi:10.1038/s41596-023-00920-w), 2023-11-30
Supplement: MOESM3 [file 41596_2023_920_MOESM3_ESM12.xlsx]

## Sheet: Supplementary Figure 5c
Supplementary Figure 5c	Gluc activity (RLU)
		WT	K27A	N58D	R59A	E73A	K27A/E73A	R59A/E73A	K27A/R59A/E73A	K27A/N58D/R59A/E73A	Mock
	Condition	Dark
	Biological replicate #1	165501	385669	664880	284959	1649709	2796996	2001862	2110657	3143294	3647957
	Biological replicate #2	172265	520703	700205	458164	1450202	2164281	1531489	2437071	3045566	2721821
	Biological replicate #3	180550	406472	661072	270270	2043585	2786409	1836747	2869763	2616287	2855891
	Biological replicate #4	190808	310867	646567	410851	1549970	2178005	1440894	1030952	2780718	2829538
	Condition	Light
	Biological replicate #1	45806	99957	199564	67797	282862	386742	283280	268102	625535	3140992
	Biological replicate #2	64722	88133	211588	67391	295618	350214	237440	290978	727952	3293012
	Biological replicate #3	103562	148335	354224	94183	532254	468575	272369	285398	595393	2335705
	Biological replicate #4	92424	159334	321888	96766	488883	451982	319089	277061	723865	2913410

## Sheet: Supplementary Figure 5d
Supplementary Figure 5d	Gluc activity (RLU)
		3A	7A	9A	12A
	Condition	Dark
	Biological replicate #1	2033680	2445382	2381560	2511303
	Biological replicate #2	2589821	2329848	2169892	2216484
	Biological replicate #3	2361671	2212912	2334783	2321735
	Condition	Light
	Biological replicate #1	656718	754349	181170	416499
	Biological replicate #2	656082	658978	215952	371099
	Biological replicate #3	598504	557294	223533	348069

## Sheet: Supplementary Figure 7c
Supplementary Figure 7c	mCherry Fluor. (a.u.)
		After	Before
	No.1	34.9197	12.0342
	No.2	14.1482	6.39131
	No.3	35.3482	9.53417
	No.4	18.6816	10.8199
	No.5	26.0149	11.2842
	No.6	14.1816	8.20083
	No.7	23.1816	2.15917
	No.8	26.5149	5.1056
	No.9	33.1482	3.03417
	No.10	27.0982	7.03417
	No.11	45.9732	7.53417
	No.12	30.3482	5.08972
	No.13	25.5982	9.20083
	No.14	13.4911	5.53417
	No.15	26.3482	4.46274
	No.16	18.6816	2.42306
	No.17	13.5982	2.08972
	No.18	16.7768	3.20083
	No.19	6.34823	2.13417
	No.20	46.9197	8.08972
	No.21	57.3482	2.53417
	No.22	38.3482	5.1056
	No.23	24.5982	0
	No.24	46.7768	0.962738
	No.25	29.2054	3.65917
	No.26	29.3482	2.20083
	No.27	44.9732	2.15917
	No.28	58.6339	0
	No.29	14.5482	0.200834
	No.30	33.0625	3.08972
	No.31	23.9732	3.65917
	No.32	14.7232	1.42306
	No.33	27.0149	0
	No.34	32.8028	3.13417
	No.35	19.6816	0.409167
	No.36	11.7482	0.784167
	No.37	22.9732	0.170531
	No.38	16.3482	1.53417
	No.39	41.8482	0.61109
	No.40	35.4593	0
	No.41	20.3482	0
	No.42	14.7482	0.079622
	No.43	20.3482	0.715985
	No.44	39.884	14.5071
	No.45	37.5772	4.88068
	No.46	29.134	2.57116
	No.47	31.559	6.86283
	No.48	28.384	16.5712
	No.49	19.6162	10.3378
	No.50	18.759	7.84894
	No.51	22.4923	9.84894
	No.52	19.359	9.03783
	No.53	23.8701	8.13783
	No.54	28.959	1.88068
	No.55	15.759	7.55601
	No.56	13.4733	8.23783
	No.57	13.9257	8.73783
	No.58	14.259	5.37419
	No.59	19.384	5.83783
	No.60	15.5923	0.612826
	No.61	27.759	2.01055
	No.62	18.9129	0.071159
	No.63	16.9257	0
	No.64	21.359	0
	No.65	16.5772	0.271159
	No.66	5.21356	1.86283
	No.67	17.884	0
	No.68	14.5923	3.9143
	No.69	9.13401	1.90449
	No.70	8.03174	0
	No.71	5.5772	0.737826
	No.72	17.509	0
	No.73	14.9733	0
	No.74	10.259	1.43783
	No.75	30.2205	0.404493
	No.76	14.0667	1.33783
	No.77	24.0447	0
	No.78	10.3744	0.737826
	No.79	18.634	0
	No.80	29.9585	12.0921
	No.81	58.6085	4.80979
	No.82	40.1585	7.3007
	No.83	29.5251	13.4098
	No.84	10.6918	9.44055
	No.85	26.3585	13.4955
	No.86	41.914	12.9241
	No.87	30.3585	5.00979
	No.88	30.2335	5.70979
	No.89	43.2474	0
	No.90	41.5585	6.13836
	No.91	37.8585	3.94312
	No.92	30.8585	0
	No.93	27.3585	0
	No.94	17.5251	2.05594
	No.95	16.1585	0
	No.96	17.8585	0.781215
	No.97	16.4835	3.09868
	No.98	5.9299	0
	No.99	33.6085	0
	No.100	33.787	1.30069
	No.101	25.0727	0
	No.102	25.787	0
	No.103	16.3585	2.70979
	No.104	18.3585	4.43201
	No.105	12.1085	0
	No.106	12.1585	0
	No.107	20.0585	0
	No.108	9.35847	0
	No.109	23.3585	0
	No.110	21.9299	0.376453
	No.111	24.5585	0
	No.112	34.4162	11.7087
	No.113	26.9995	6.34201
	No.114	22.7495	4.34201
	No.115	22.7495	11.9706
	No.116	14.4162	8.89916
	No.117	20.3495	7.72383
	No.118	21.8745	3.37535
	No.119	17.5828	4.94201
	No.120	19.7495	4.14201
	No.121	11.4638	3.54202
	No.122	20.7495	4.14201
	No.123	22.9995	2.41702
	No.124	12.7495	0.792015
	No.125	11.5495	0.684872
	No.126	29.0828	3.54202
	No.127	30.0352	2.04202
	No.128	26.9995	0
	No.129	28.7495	0
	No.130	24.1245	1.62535
	No.131	26.4638	0
	No.132	47.5828	0.342015
	No.133	19.7495	3.07535
	No.134	34.7495	3.14201
	No.135	18.0828	1.31979
	No.136	12.5495	3.66702
	No.137	18.2495	4.79202
	No.138	25.3495	3.98646
	No.139	26.9995	2.87535
	No.140	13.9995	0.642015
	No.141	5.58284	1.82773
	No.142	3.41617	0
	No.143	3.1495	2.0157
	No.144	6.91617	2.20868
	No.145	10.4995	0.653126
	No.146	44.7546	2.85819
	No.147	23.2962	6.49152
	No.148	21.4212	5.65819
	No.149	9.17122	4.90819
	No.150	18.1355	4.49152
	No.151	20.0879	0.95819
	No.152	17.4212	3.32486
	No.153	7.42122	1.78319
	No.154	9.04622	2.65819
	No.155	6.82122	3.15819
	No.156	6.42122	2.88546
	No.157	12.7784	4.65819
	No.158	14.0212	2.53319
	No.159	17.1355	3.25819
	No.160	12.6212	3.06728
	No.161	11.1712	3.35819
	No.162	16.8498	2.53319
	No.163	15.1485	0.729619
	No.164	12.9212	2.32486
	No.165	11.7962	2.65819
	No.166	9.56408	0.15819
	No.167	14.4212	0
	No.168	9.79622	1.82486
	No.169	11.2212	4.01533
	No.170	9.25455	4.85819
	No.171	9.42122	2.04708
	No.172	11.2962	2.58676
	No.173	8.75455	2.35819
	No.174	3.17122	1.49152
	No.175	7.75455	3.05819
	No.176	2.78486	0.380412
	No.177	4.64344	0
	No.178	4.51213	1.90819
	No.179	7.72122	0.40819
	No.180	0.492651	1.90819
	No.181	4.99265	1.65819
	No.182	3.26738	1.95819
	No.183	24.9364	7.30664
	No.184	10.8606	2.17027
	No.185	10.8273	0.170273
	No.186	22.5273	0
	No.187	12.8606	2.50361
	No.188	6.19395	0.670273
	No.189	15.2773	2.00361
	No.190	9.42728	7.83694
	No.191	19.194	1.50361
	No.192	26.7773	0
	No.193	22.8844	2.39755
	No.194	19.6273	1.78138
	No.195	22.0273	1.00361
	No.196	17.1701	3.50361
	No.197	16.313	4.00361
	No.198	9.74157	7.33694
	No.199	30.8844	6.17027
	No.200	18.694	8.07027
	No.201	24.1523	4.57027
	No.202	16.0273	1.67027
	No.203	15.5273	2.00361
	No.204	16.6273	0
	No.205	20.4559	2.47027
	No.206	16.1701	1.52742
	No.207	8.36062	2.67027
	No.208	5.90228	1.67027
	No.209	18.1106	2.50361
	No.210	18.3606	1.07027
	No.211	14.8051	1.52742
	No.212	12.7416	0
	No.213	11.2091	0.920273
	No.214	9.52728	1.50361
	No.215	12.7416	0
	No.216	12.8455	0.670273
	No.217	2.65228	1.12482
	No.218	6.02728	2.55916
	No.219	12.9023	1.83694
	No.220	5.22728	0.795273
	No.221	13.8807	6.12241
	No.222	24.8352	4.20574
	No.223	19.0057	2.74145
	No.224	21.1807	4.28907
	No.225	15.7807	5.35574
	No.226	20.1807	6.65574
	No.227	27.8807	6.20574
	No.228	18.714	4.28907
	No.229	18.5057	5.62241
	No.230	15.8807	1.74145
	No.231	9.21402	1.12241
	No.232	11.108	0
	No.233	22.2378	4.28907
	No.234	9.08069	2.67003
	No.235	5.88069	1.83074
	No.236	3.78069	2.95574
	No.237	8.63069	0.95574
	No.238	15.5474	0.05574
	No.239	13.714	1.62241
	No.240	13.7807	1.34463
	No.241	11.5807	1.08074
	No.242	11.714	4.70574
	No.243	9.38069	2.45574
	No.244	5.88069	2.02717
	No.245	7.54736	0
	No.246	6.71402	2.12241
	No.247	7.38069	1.17003
	No.248	14.3807	2.45574
	No.249	8.38069	0
	No.250	6.66641	0
	No.251	10.1307	0
	No.252	9.04736	0
	No.253	12.3807	2.95574
	No.254	9.63069	1.0113
	No.255	7.63069	4.62241
	No.256	21.5548	1.63159
	No.257	14.8048	0
	No.258	44.5548	4.40659
	No.259	38.1548	0
	No.260	20.3548	3.00659
	No.261	14.0548	2.79231
	No.262	13.8048	0
	No.263	14.6976	1.17326
	No.264	30.8881	1.50659
	No.265	15.2691	0
	No.266	14.8048	0
	No.267	13.5548	0.363736
	No.268	7.22143	0
	No.269	13.5548	3.17326
	No.270	26.5548	0.506593
	No.271	11.8881	5.28437
	No.272	20.0548	6.67326
	No.273	24.1548	3.88159
	No.274	10.2691	5.00659
	No.275	12.2214	2.70659
	No.276	11.5548	4.90659
	No.277	12.8881	2.25659
	No.278	8.35477	1.39548
	No.279	13.2691	3.50659
	No.280	7.95477	2.50659
	No.281	9.8881	2.96114
	No.282	8.80476	2.07802
	No.283	23.7214	3.25659
	No.284	8.8881	4.25659
	No.285	1.55476	1.17326
	No.286	5.55476	0.220879
	No.287	5.55476	1.50659
	No.288	7.05476	0.062149
	No.289	9.8881	0
	No.290	4.30476	1.63159
	No.291	9.69122	1.36892
	No.292	23.9912	1.86892
	No.293	9.99122	3.46508
	No.294	21.8912	2.38815
	No.295	16.8246	4.89165
	No.296	15.9912	0.618923
	No.297	6.89122	4.41892
	No.298	5.99122	0.993923
	No.299	26.9912	0.849692
	No.300	21.9912	1.52801
	No.301	26.7412	0
	No.302	6.89122	2.61892
	No.303	11.6912	6.61892
	No.304	18.2912	0.493923
	No.305	12.1579	0
	No.306	9.49122	0.718923
	No.307	18.2412	1.91304
	No.308	18.4912	4.61892
	No.309	23.0912	4.41892
	No.310	6.15789	0
	No.311	7.82456	0
	No.312	7.32456	0
	No.313	8.49122	1.99392
	No.314	7.15789	1.35226
	No.315	8.32456	1.36892
	No.316	5.06265	0.465077
	No.317	8.29122	0.346196
	No.318	10.0912	1.33321
	No.319	8.82456	6.04749
	No.320	7.09122	6.28559
	No.321	13.4912	1.43711
	No.322	9.89122	3.61892
	No.323	9.15789	4.78559
	No.324	6.82456	0.89165
	No.325	7.99122	0
	No.326	5.32456	2.4371
	No.327	8.69122	0.346196
	No.328	8.30941	1.06337
	No.329	23.6772	6.79373
	No.330	20.6772	1.59373
	No.331	23.6772	3.5604
	No.332	12.6772	0.393729
	No.333	19.5343	2.5604
	No.334	28.8438	0.108015
	No.335	12.6772	1.72706
	No.336	30.0772	2.72706
	No.337	21.1772	1.39373
	No.338	10.9272	0
	No.339	7.67717	0.227062
	No.340	18.6772	0
	No.341	8.17717	0
	No.342	15.6772	0
	No.343	12.5105	0
	No.344	10.6772	0
	No.345	9.92717	0
	No.346	6.82002	0.693729
	No.347	11.3438	0.893729
	No.348	16.3772	2.5604
	No.349	8.55217	4.49373
	No.350	7.42717	6.39373
	No.351	3.17717	0.50484
	No.352	6.85898	0
	No.353	2.97717	0
	No.354	10.5772	2.59373
	No.355	6.47717	3.39373
	No.356	8.55217	4.28262
	No.357	9.0105	4.25087
	No.358	8.67717	0
	No.359	6.0105	4.39373
	No.360	6.42717	0
	No.361	7.52332	0.768729
	No.362	10.3438	1.39373
